# Supplementary material
Source: MDPI journal article supplement (https://www.mdpi.com/2311-7524/9/4/434)

**Table S1.** Primer sequences used in this work.

| Gene                                        | Forward Primers (5'-3')    | Reverse Primers (5'-3')     |
|---------------------------------------------|----------------------------|-----------------------------|
| <i>AMT1;1</i>                               | ATCCGACGCCAACTACACTTCTAC   | CGATTGGTCACAGATGAAGTGAG     |
| <i>AMT1;2</i>                               | AAGCGAGGATGAGACTCAAGGG     | GCAGGACTGGCATCATTAACAGG     |
| <i>AMT1;5</i>                               | ACAGATAGTGGTAATTATAGGGTGGG | CGTGGTCATGGTACACGTAAGC      |
| <i>AMT1;6</i>                               | GTAACCTATTGTTACCTCTGGGGC   | CGTTCCTGAACGCGTCAAT         |
| <i>AMT1;8</i>                               | GTTGTTAGGCTCTGGAGCCATTG    | GCCTTCCCAAACGTGTCAAAC       |
| <i>AMT2;1</i>                               | GTGACGATGGATCGATTGAGACTC   | CCCGCTAACAAAATAAGAGTAATAGCT |
| <i>AMT2;2</i>                               | ATATCGGAGATGACGCGGTTT      | CGTACGCTGCTGTATTCCGAC       |
| <i>AMT3;1</i>                               | TCACTGGCCTCGTCTGCATTAC     | GGTGTCTGCAACTGCGGATAAC      |
| <i>AMT4;2</i>                               | GGAGGTCCCAACGTGCACAC       | CACGATGAACCGAATCAGAAAAC     |
| <i>AMT4;3</i>                               | ATCAGTGGCTTAGTTTGCATTACTC  | GACTTGCTTTAGGATGCCGATT      |
| <i>NRT2;4</i>                               | CAGAAGGTGAACCCGGAAG        | CAAGTGGAACGTCCTCATGTG       |
| <i>NRT2;5</i>                               | TTGTGGTCCATCTAAGAACAAGGC   | TCATCAGAGGGTCGGGTAACAG      |
| <i>NRT2;7</i>                               | TCTCCAGGCAGACGAGCATT       | GGAGCAAGTGATACTGGTTTGTTC    |
| <i>NRT1;1</i>                               | CTGGCTGGTCCCACAGTTCTT      | CTTCATTCTTCGGGCACTC         |
| <i>NRT1;2</i>                               | TTAATTGCTGCCACACTTCATAG    | CACGATGTTGGTTCTGATACTTC     |
| <i>EF-1<math>\alpha</math></i> <sup>1</sup> | ATTCAAGTATGCCTGGGTGC       | CAGTCAGCCTGTGATGTTC         |
| <i>AMT1;2C</i> <sup>2</sup>                 | ATGGCCACTCTGACCTGCAC       | TTATGCAGGACTGGCATCATTAAC    |
| <i>AMT1;2G</i> <sup>3</sup>                 | GGGGTACCATGGCCACTCTG       | GCTCTAGATGCAGGACTGGCATC     |
| <i>AMT1;2Y</i> <sup>4</sup>                 | GGGGTACCATGGCCACTCTGAC     | GCTCTAGATTATGCAGGACTGGCAT   |
| <i>AMT1;2A</i> <sup>5</sup>                 | GCTCTAGAATGGCCACTCTGAC     | GGGGTACCTTATGCAGGACTG       |

<sup>1</sup>Served as internal control.

<sup>2</sup>Primers used for cloning of *AMT1;2*.

<sup>3</sup>Primers used for the expression vector pC1300 containing GFP gene.

<sup>4</sup>Primers used for the expression vectors pYES2.

<sup>5</sup>Primers used for the overexpression vector super1300.

**Figure S1.** The effect of drought and rewatering on expression levels of AMTs and NRTs in root (A) and leaves (B) of *Malus hupehensis* plants.

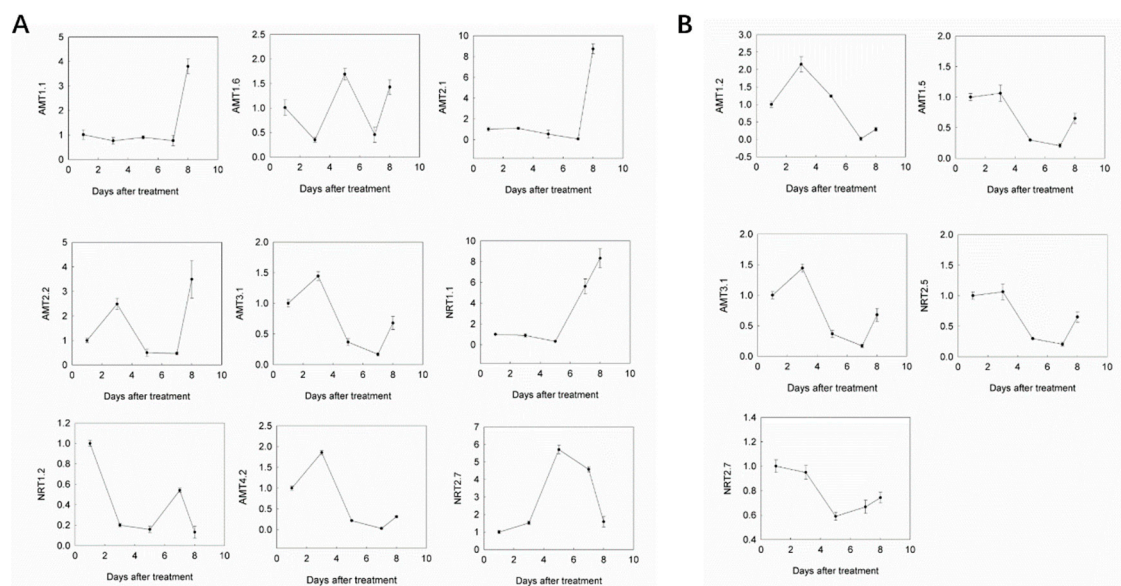

Supplement: s1 [file s1]
